# Supplementary material for: Acid-stimulated bioassembly of high-performance quantum dots in Escherichia coli
Source: Royal Society of Chemistry journal article supplement (doi:10.1039/c9ta06136c), 2019-01-01
Supplement: c9ta06136c1.pdf [file c9ta06136c1.pdf]

**Supplementary information**

**Acid-Stimulated Bioassembly of High-Performance Quantum Dots in *Escherichia coli***

Li-Jiao Tian,<sup>a</sup> Wen-Wei Li,<sup>a,\*</sup> Ting-Ting Zhu,<sup>a</sup> Guo-Hua Zhao,<sup>b</sup> Xian-Wei Liu,<sup>a</sup> Jun-Cai Dong,<sup>c</sup> Peng-Fei An,<sup>c</sup>  
Jing-Yuan Ma,<sup>d</sup> Fang Shen,<sup>e</sup> Chen Qian,<sup>a</sup> Bing Hu,<sup>e</sup> Han-Qing Yu<sup>a</sup>

<sup>a</sup>Department of Applied Chemistry, University of Science and Technology of China, Hefei 230026, China.  
E-mail: wwli@ustc.edu.cn

<sup>b</sup>Department of Chemistry, Shanghai Key Lab of Chemical Assessment and Sustainability, Tongji University, Shanghai, 200092, China.

<sup>c</sup>Beijing Synchrotron Radiation Laboratory, Institute of High Energy Physics, Chinese Academy of Science, Beijing, 100049, China

<sup>d</sup>Shanghai Synchrotron Radiation Facility, Shanghai Institute of Applied Physics, Chinese Academy of Sciences, Shanghai 201204, China

<sup>e</sup>CAS Key Laboratory of Brain Function and Disease, School of Life Sciences, University of Science and Technology of China

This supporting information contains 16-page document, including 4 tables, 10 figures, references and this cover page.

**Table S1.** Emission lifetime measurements of freshly isolated Bio-QDs. Each curve was fitted with a three components exponential-decay function.  $\tau_i$  are the lifetimes of each decay component and  $A_i$  their respective fractional intensity.  $\chi^2$  is the reduced chi-squared statistic. Average lifetimes were calculated using equation:  $\tau = \sum A_i \times \tau_i^2 / \sum A_i \times \tau_i$ .

| Samples         | $\tau_1$ (ns) | $\tau_2$ (ns) | $\tau_3$ (ns) | $A_1$ (%) | $A_2$ (%) | $A_3$ (%) | Average lifetime (ns) | $\chi^2$ |
|-----------------|---------------|---------------|---------------|-----------|-----------|-----------|-----------------------|----------|
| pH 4.5 - 5 min  | 119±1.49      | 19±0.83       | 3.1±0.04      | 50±0.01   | 25±0.02   | 25±0.07   | 110                   | 1.5      |
| pH 4.5 - 2 h    | 130±0.62      | 31±0.23       | 3.6±0.05      | 61±0.01   | 29±0.03   | 10±0.1    | 119                   | 2.0      |
| pH 4.5 - 4.5 h  | 124±0.53      | 27±0.46       | 3.2±0.04      | 62±0.01   | 28±0.04   | 10±0.14   | 115                   | 2.3      |
| pH 4.5 - 7.5 h  | 125±0.56      | 27±0.48       | 3.4±0.04      | 62±0.01   | 28±0.04   | 10±0.13   | 116                   | 2.4      |
| pH 4.5 - 10.5 h | 133±0.51      | 32±0.02       | 3.7±0.05      | 62±0.01   | 30±0.03   | 8±0.12    | 122                   | 2.2      |
| pH 3.5 - 4.5 h  | 41±1.39       | 0.91±0.06     | 0.53±0.06     | 19±0.01   | 19±0.1    | 62±0.03   | 38                    | 1.4      |
| pH 5.5 - 4.5 h  | 116±1.28      | 15.9±0.66     | 2.9±0.04      | 53±0.01   | 25±0.01   | 22±0.05   | 109                   | 1.8      |
| pH 6.5 - 4.5 h  | 109±1.46      | 12.3±0.67     | 2.8±0.04      | 49±0.01   | 28±0.02   | 23±0.05   | 102                   | 1.5      |
| pH 7.5 - 4.5 h  | 80±1.36       | 8.8±0.03      | 1.8±0.04      | 43±0.01   | 36±0.04   | 21±0.14   | 73                    | 1.7      |
| pH 8.5 - 4.5 h  | 89±2.08       | 9.0±0.40      | 2.2±0.04      | 34±0.01   | 41±0.02   | 25±0.06   | 79                    | 1.4      |
| pH 9.5 - 4.5 h  | 62±2.62       | 7.1±0.24      | 1.6±0.03      | 17±0.01   | 56±0.02   | 27±0.07   | 45                    | 1.3      |
| pH 10.5 - 4.5 h | 41±1.11       | 5.8±0.11      | 1.14±0.02     | 16±0.01   | 60±0.07   | 24±0.26   | 28                    | 1.5      |

1 **Table S2. Synthesis rates and optical properties of Bio-QDs reported in literature and obtained in this study.**

| Organism                            | Material                           | Optical properties               | Cell growth   | Seleniumized cells | QDs growth                                   | Ref.      |
|-------------------------------------|------------------------------------|----------------------------------|---------------|--------------------|----------------------------------------------|-----------|
| Engineered <i>E. coli</i>           | CdS                                | QY: 0.007 %                      | -             | 1 h 37 °C          | 3 h 37 °C                                    | 1         |
| <i>Rhodopseudomonas palustris</i>   | CdS                                | -                                | 42 h 30 °C    | -                  | 72 h 30 °C                                   | 2         |
| <i>Stenotrophomonas maltophilia</i> | CdS                                | QY: 0.3-2.08 %                   | 12 h 37 °C    | 2 h 37 °C          | 5 h 37 °C - yellow                           | 3         |
| Engineered <i>E. coli</i>           | CdSe/CdTe                          | -                                | -             | -                  | 6-12 h 37 °C                                 | 4         |
| Engineered <i>E. coli</i>           | CdTe                               | -                                | -             | -                  | 24 h 37 °C                                   | 5         |
| <i>E. coli</i>                      | CdSe                               | -                                | 10-14 h 37 °C | 2 h 37 °C          | 32 h - yellow                                | 6         |
| <i>S. cerevisiae</i>                | CdSe                               | -                                | 24 h 30 °C    | 24 h 30 °C         | 24 h 30 °C - yellow                          | 7         |
| Engineered <i>S. cerevisiae</i>     | CdSe                               | QY: 4.7%                         | 24 h 30 °C    | 24 h 30 °C         | 24 h 30 °C                                   | 8         |
| <i>Helminthosporium solani</i>      | CdSe                               | QY: 1 %                          | 96 h 37 °C    | -                  | 96 h 37 °C                                   | 9         |
| Earthworm                           | CdTe                               | QY: 8.3%<br>Lifetime: 4.54 ns    | -             | -                  | 11 days 20 °C                                | 10        |
| Biomimetic synthesis                | CdS                                | QY:15.8% (green),<br>14.1% (red) | -             | -                  | Within days (37 °C);<br>Within hours (80 °C) | 11        |
| <i>E. coli</i>                      | CdS <sub>x</sub> Se <sub>1-x</sub> | QY: 7.3%<br>Lifetime: 133 ns     | 10 h 37 °C    | 5 min 37 °C        | Yellow: within 0.5 h 37 °C                   | This work |

2

**Table S3.** Se-K XANES edge fitted results of samples from different pH groups

| Sample  | CdSe  | Se    | Na <sub>2</sub> SeO <sub>3</sub> | SeMet  | SeCys <sub>2</sub> |
|---------|-------|-------|----------------------------------|--------|--------------------|
| pH 3.5  | 0     | 1     | 0                                | 0      | 0                  |
| pH 4.5  | 0.567 | 0.16  | 0.024                            | 0.0169 | 0.081              |
| pH 5.5  | 0.189 | 0.127 | 0.16                             | 0.528  | 0                  |
| pH 6.5  | 0     | 0     | 0.543                            | 0.476  | 0                  |
| pH 7.5  | 0     | 0     | 0.874                            | 0.143  | 0                  |
| pH 8.5  | 0     | 0     | 0.953                            | 0.048  | 0                  |
| pH 9.5  | 0     | 0     | 0.954                            | 0.064  | 0                  |
| pH 10.5 | 0     | 0     | 0.939                            | 0.07   | 0                  |

**Table S4.** Se *K*-edge EXAFS curve fitting parameters <sup>a</sup>.

| Sample                                        | Shell | <i>N</i> | <i>R</i><br>(Å) | $\sigma^2$<br>(Å <sup>2</sup> ) | $\Delta E_0$ (eV) | <i>R</i> (%) |
|-----------------------------------------------|-------|----------|-----------------|---------------------------------|-------------------|--------------|
| Se <sup>b</sup>                               | Se-Se | <b>2</b> | 2.38 (1)        | 0.004 (1)                       | 6.9 (4)           | 0.1          |
| CdSe <sup>c</sup>                             | Se-Cd | <b>4</b> | 2.62 (1)        | 0.005 (1)                       | 2.8 (4)           | 0.1          |
| Na <sub>2</sub> SeO <sub>3</sub> <sup>d</sup> | Se-O  | <b>3</b> | 1.70 (1)        | 0.002 (3)                       | 8.9 (5)           | 0.7          |
| SeMet <sup>e</sup>                            | Se-C  | <b>6</b> | 1.96 (1)        | 0.002 (4)                       | 8.7 (7)           | 0.9          |
| pH 3.5 <sup>f</sup>                           | Se-Se | 2.6 (2)  | 2.35 (1)        | 0.004 (1)                       | 7.3 (8)           | 0.1          |
|                                               | Se-Se | 1.0 (3)  | 2.33 (1)        | 0.004 (2)                       |                   |              |
| pH 4.5 <sup>g</sup>                           | Se-Cd | 2.2 (2)  | 2.59 (1)        | 0.006 (1)                       | 3.2 (8)           | 0.1          |
|                                               | Se-C  | 0.2 (2)  | 1.99 (1)        | 0.004 (4)                       |                   |              |
|                                               | Se-O  | 0.2 (1)  | 1.49 (4)        | 0.007 (4)                       |                   |              |
|                                               | Se-Se | 1.3 (3)  | 2.33 (1)        | 0.004 (1)                       |                   |              |
| pH 5.5 <sup>h</sup>                           | Se-Cd | 0.5 (3)  | 2.63 (5)        | 0.009 (1)                       | 17.5 (8)          | 0.1          |
|                                               | Se-C  | 1.5 (2)  | 1.97 (7)        | 0.002 (4)                       |                   |              |
|                                               | Se-O  | 1.1 (1)  | 1.70 (1)        | 0.003 (1)                       |                   |              |
|                                               | Se-Se | 0.7 (5)  | 2.38 (4)        | 0.002 (2)                       |                   |              |
| pH 6.5 <sup>i</sup>                           | Se-Cd | 0.3 (3)  | 2.78 (5)        | 0.003 (1)                       | 13.8 (2)          | 0.9          |
|                                               | Se-C  | 1.0 (6)  | 1.97 (5)        | 0.003 (1)                       |                   |              |
|                                               | Se-O  | 2.1 (4)  | 1.70 (4)        | 0.003 (1)                       |                   |              |
| pH 7.5 <sup>j</sup>                           | Se-C  | 0.5 (4)  | 2.15 (6)        | 0.002 (1)                       | 10.0 (2)          | 0.7          |
|                                               | Se-O  | 2.8 (2)  | 1.70 (1)        | 0.002 (1)                       |                   |              |
| pH 8.5 <sup>k</sup>                           | Se-O  | 3.1 (1)  | 1.71 (2)        | 0.002 (1)                       | 12.4 (4)          | 0.7          |
| pH 9.5 <sup>l</sup>                           | Se-O  | 3.2 (3)  | 1.71 (2)        | 0.002 (1)                       | 12.6 (4)          | 0.6          |
| pH 10.5 <sup>m</sup>                          | Se-O  | 3.2 (3)  | 1.71 (2)        | 0.002 (1)                       | 13.3 (4)          | 0.6          |

<sup>a</sup>*N*, coordination number; *R*, distance between absorber and backscatter atoms;  $\sigma^2$ , Debye–Waller factor to account for both thermal and structural disorders;  $\Delta E_0$ , inner potential correction; *R* factor (%) indicates the goodness of the fit. Errors are given in brackets.  $S_0^2$  was fixed to 0.8 as determined from CdSe standard fitting. Bold numbers indicate fixed coordination number (*N*) according to the crystal structure. <sup>b</sup> Fitting range:  $3 \leq k$  (/Å)  $\leq 14.2$  and  $1.7 \leq R$  (Å)  $\leq 2.5$ . <sup>c</sup> Fitting range:  $3 \leq k$  (/Å)  $\leq 12.5$  and Fitting range:  $1.7 \leq R$  (Å)  $\leq 2.8$ . <sup>d</sup> Fitting range:  $4.0 \leq k$  (/Å)  $\leq 13.3$  and  $1 \leq R$  (Å)  $\leq 1.7$ . <sup>e</sup> Fitting range:  $3.5 \leq k$  (/Å)  $\leq 13.6$  and  $1.3 \leq R$  (Å)  $\leq 1.9$ . <sup>f</sup> Fitting range:  $4.5 \leq k$  (/Å)  $\leq 13.5$  and  $1.3 \leq R$  (Å)  $\leq 2.5$ . <sup>g</sup> Fitting range:  $2.5 \leq k$  (/Å)  $\leq 11.7$  and  $1.0 \leq R$  (Å)  $\leq 3.1$ . <sup>h</sup> Fitting range:  $3.5 \leq k$  (/Å)  $\leq 12.0$  and  $1.0 \leq R$  (Å)  $\leq 2.7$ . <sup>i</sup> Fitting range:  $2.8 \leq k$  (/Å)  $\leq 10.8$  and  $1.0 \leq R$  (Å)  $\leq 2.7$ . <sup>j</sup> Fitting range:  $3.6 \leq k$  (/Å)  $\leq 12.2$  and  $1.0 \leq R$  (Å)  $\leq 2.2$ . <sup>k</sup> Fitting range:  $3.6 \leq k$  (/Å)  $\leq 12.2$  and  $1.0 \leq R$  (Å)  $\leq 2.5$ . <sup>l</sup> Fitting range:  $4.1 \leq k$  (/Å)  $\leq 12.2$  and  $1.0 \leq R$  (Å)  $\leq 1.7$ . <sup>m</sup> Fitting range:  $4.1 \leq k$  (/Å)  $\leq 12.2$  and  $1.0 \leq R$  (Å)  $\leq 1.7$ .

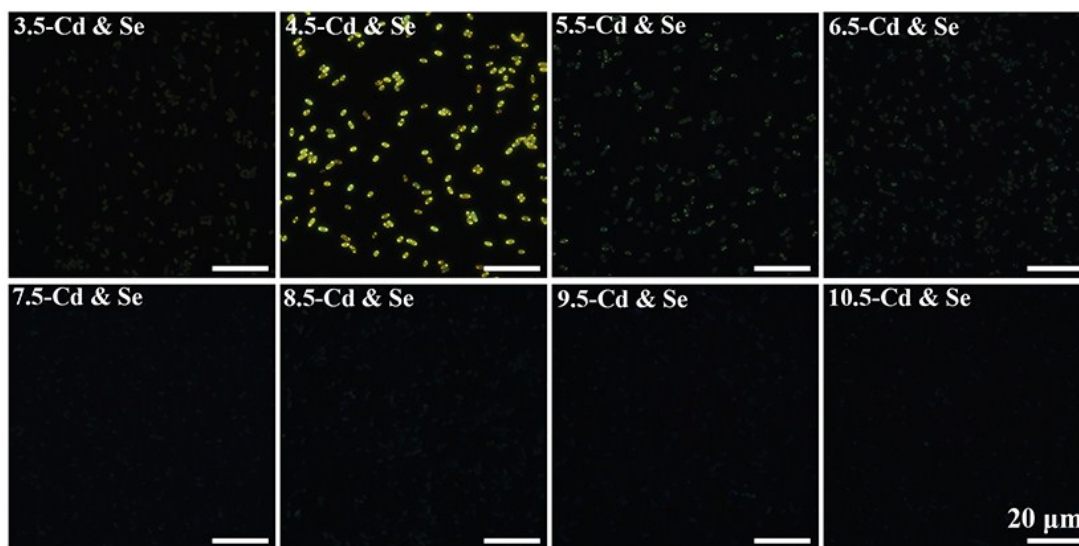

**Fig. S1.** Fluorescence images of the *E. coli* cells cultivated at different pHs. Only the Cd & Se group cells at pH 4.5 were lightened with bright yellow fluorescence.

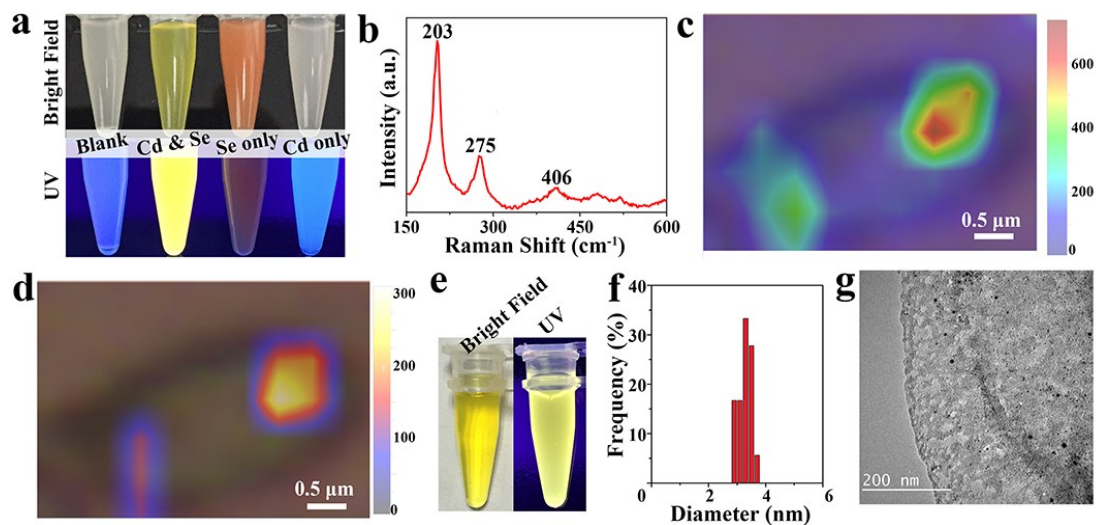

**Fig. S2.** Characteristics of the Bio-QDs synthesized at pH 4.5. (a) Images of *E. coli* cells cultivated at pH 4.5 under bright field light and UV light. Only the Cd & Se group cells showed bright yellow fluorescence. (b) The in-situ Raman spectrum of *E. coli*. Combined image of bright-field microscopy image with Raman mapping (c) at 203 cm<sup>-1</sup> the characteristic peak of Cd-Se and (d) at 275 cm<sup>-1</sup> the characteristic signal of Cd-S, respectively. (e) Bright field and UV irradiation images of the purified Bio-QDs. The extracted fluorophore from the cells still kept strong yellow fluorescence. (f) Size distribution and (g) surface chemical property of the Bio-QDs recorded by TEM image.

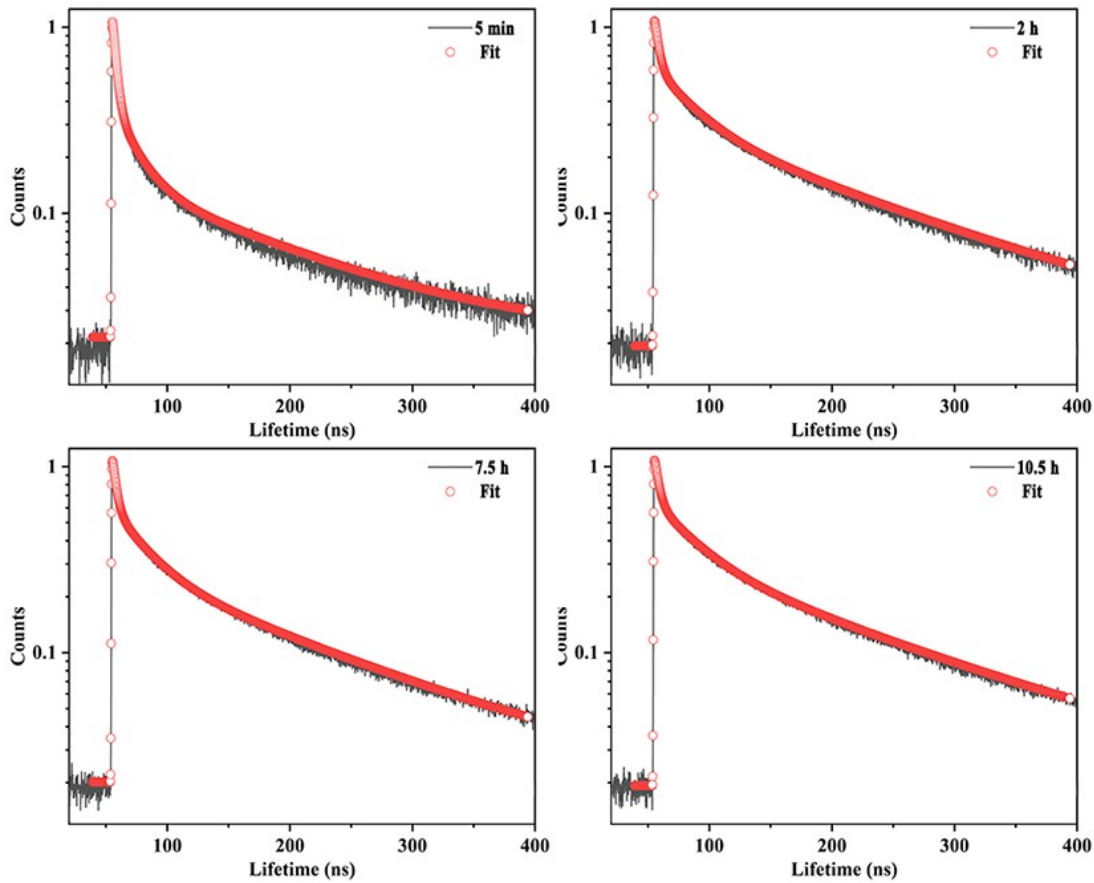

**Fig. S3.** Fitted results of the normalized emission lifetime of the Bio-QDs synthesized in pH 4.5 group. The fitted signal (red circle) superimposed on the experimental one (black line). Measured spectra matched well with the calculated results. The best-fit parameters are shown in Table S1.



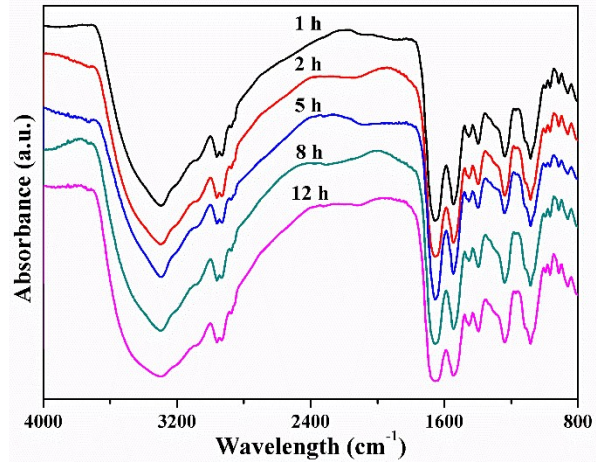

**Fig. S4.** Time-resolved FTIR spectrum of the synthesized Bio-QDs.

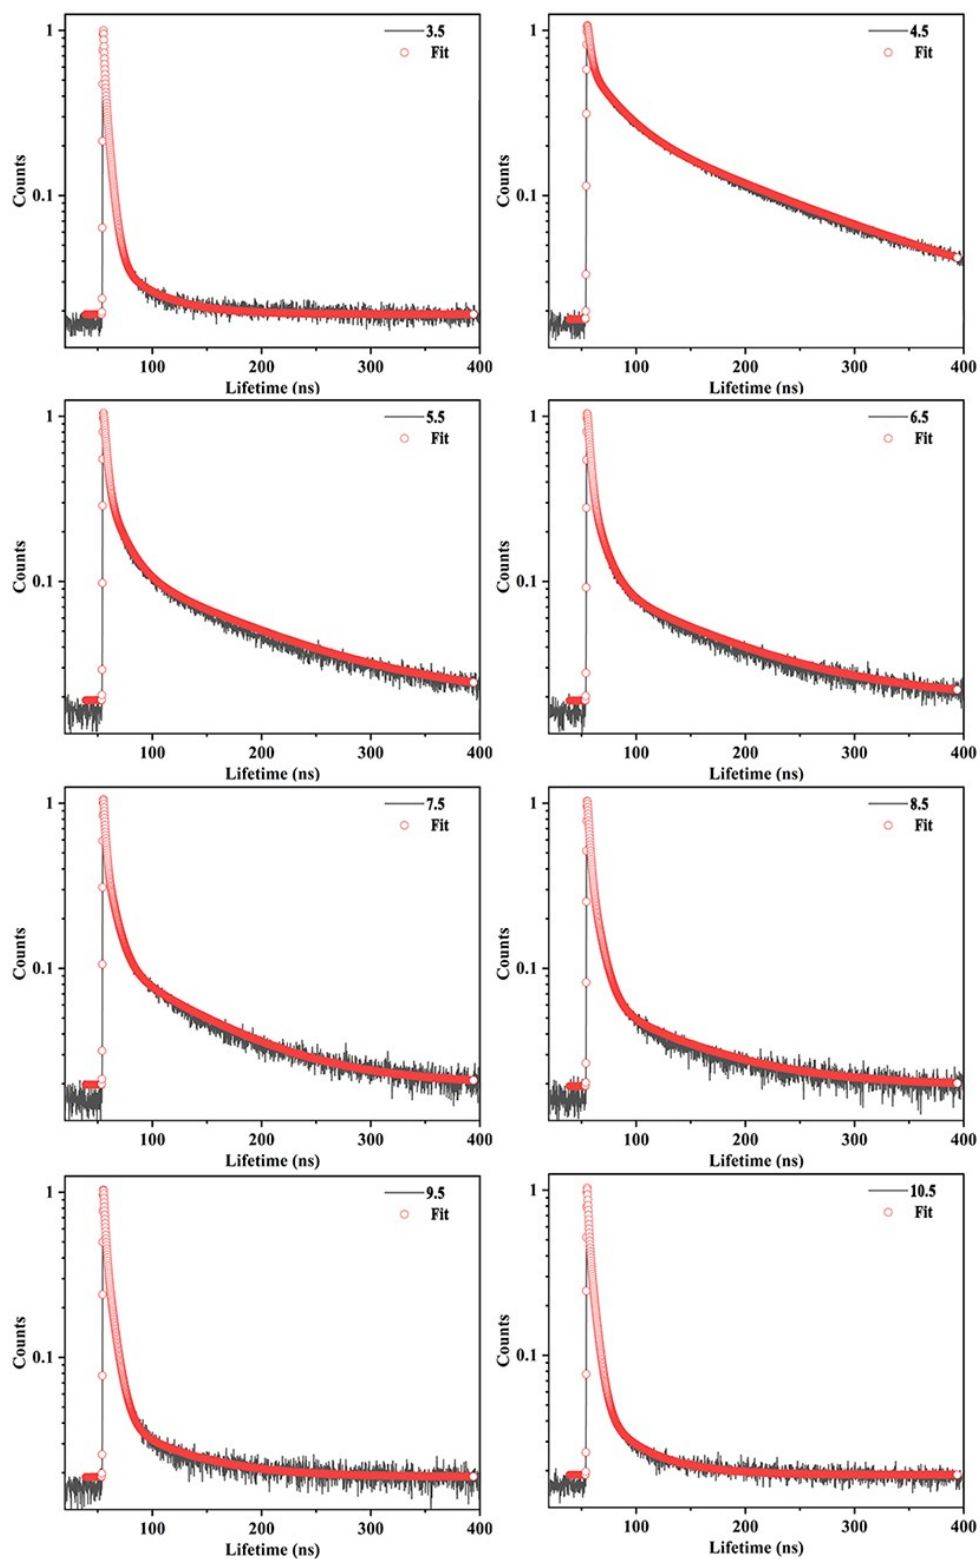

**Fig. S5.** Fitted results of the normalized emission lifetime of the Bio-QDs synthesized in different pH. The fitted signal (red circle) superimposed on the experimental one (black line). Measured spectra matched well with the calculated results. The best-fit parameters are shown in Table S1.

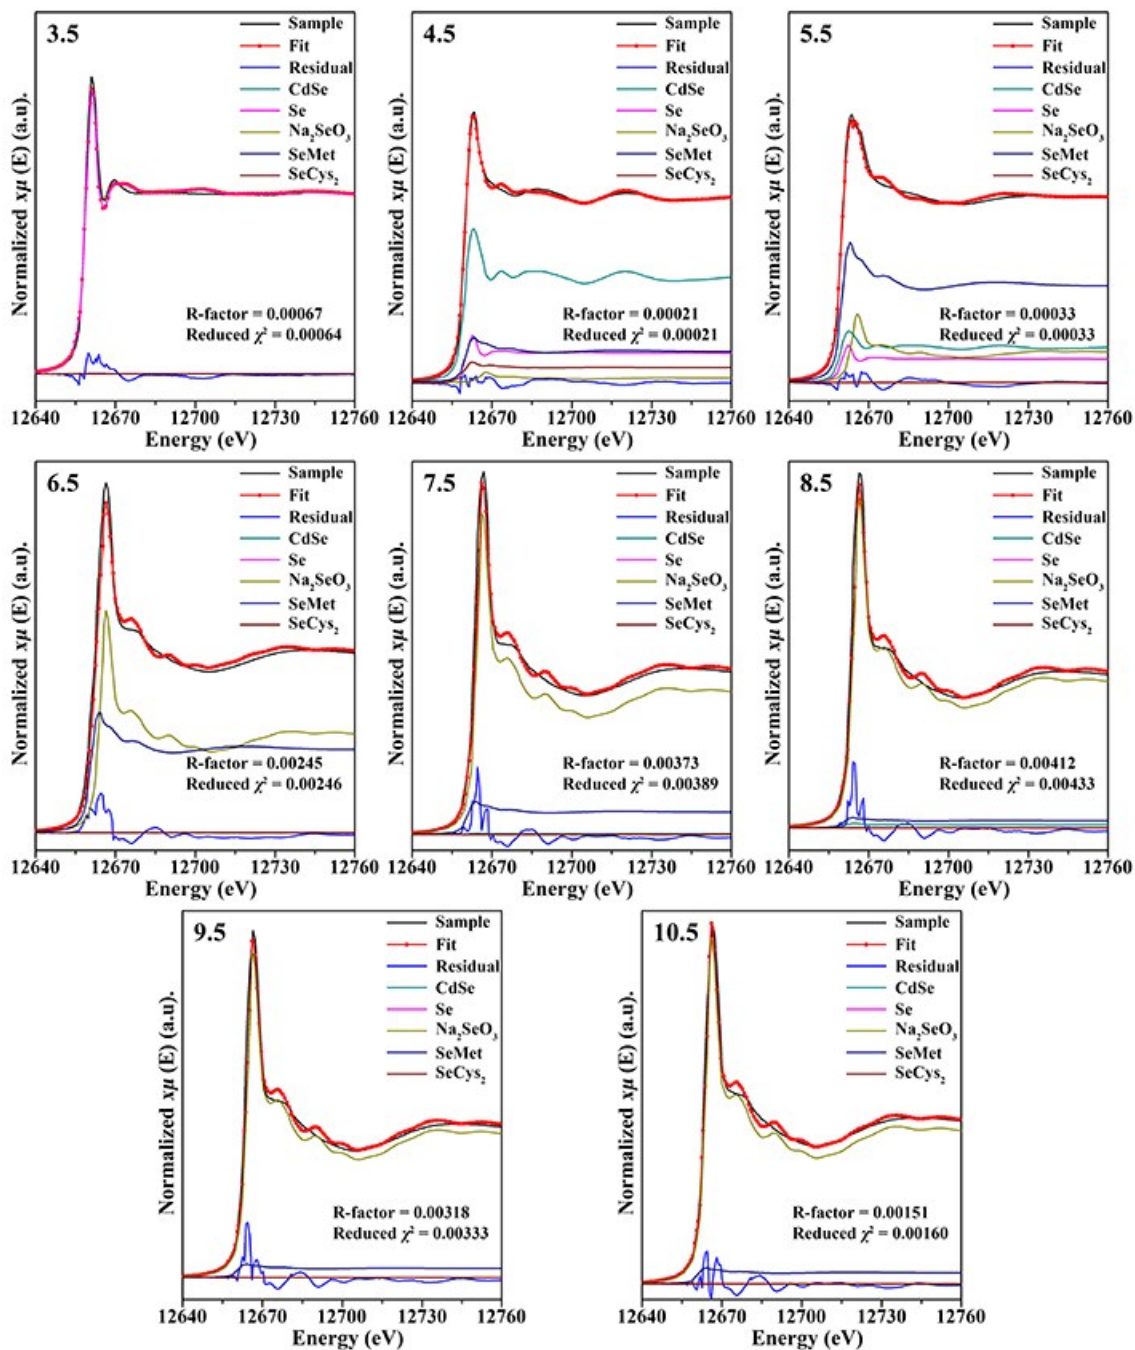

Fig. S6. LCF of the samples with standards based on Se K-edge XANES spectra.

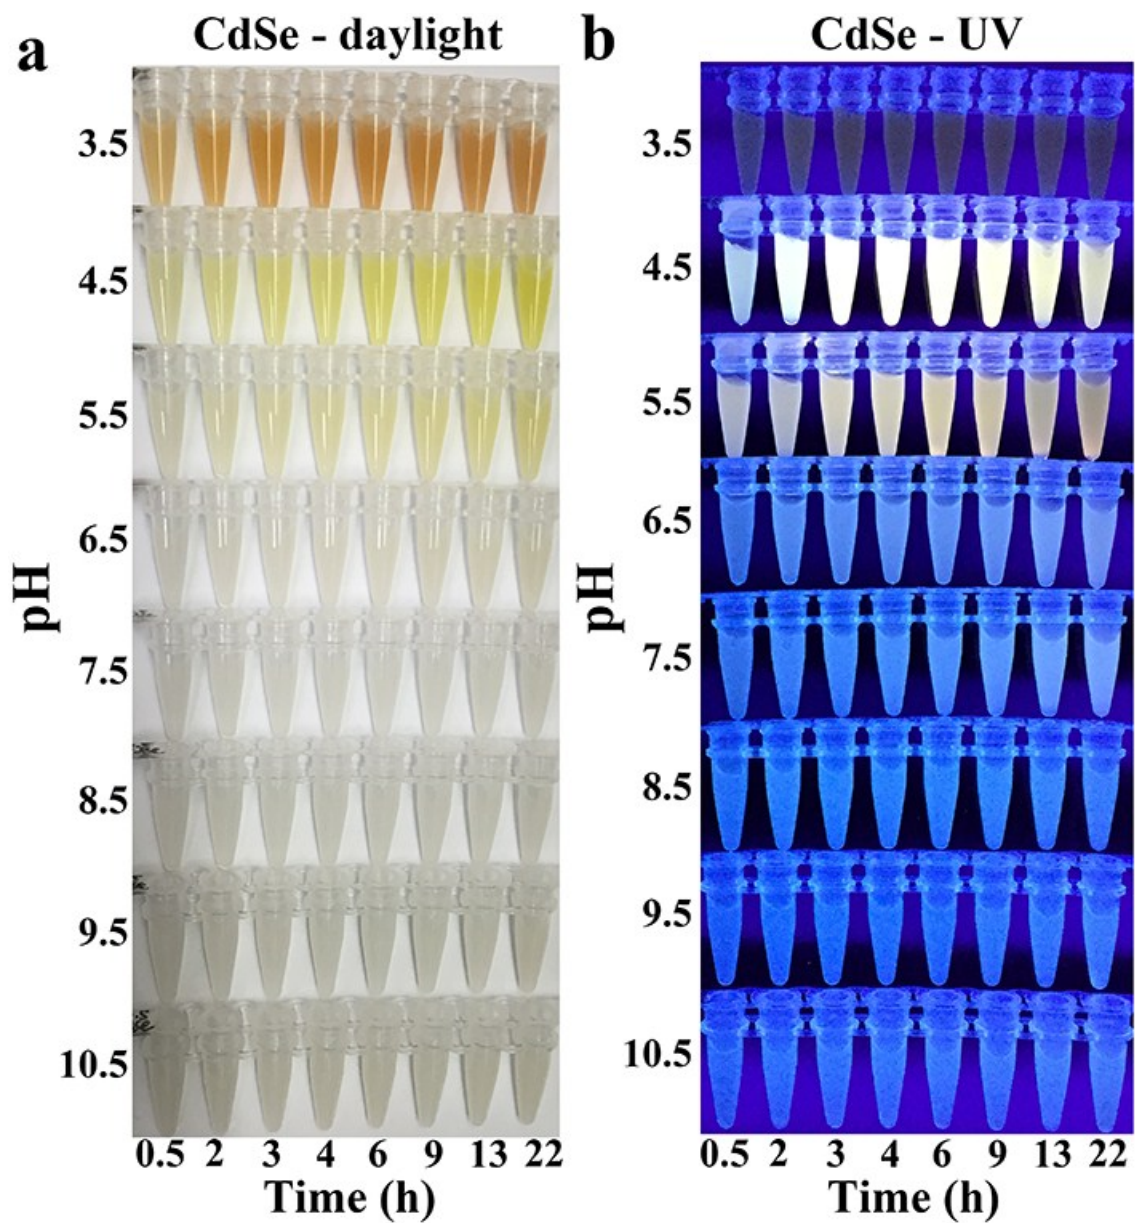

**Fig. S7.** Images of *E. coli* cells suspension collected at different incubation times under (a) bright field and (b) UV light. Cells were cultivated with 1mM  $\text{Na}_2\text{SeO}_3$  and 6 mM  $\text{CdCl}_2$  co-exposure at different pHs.

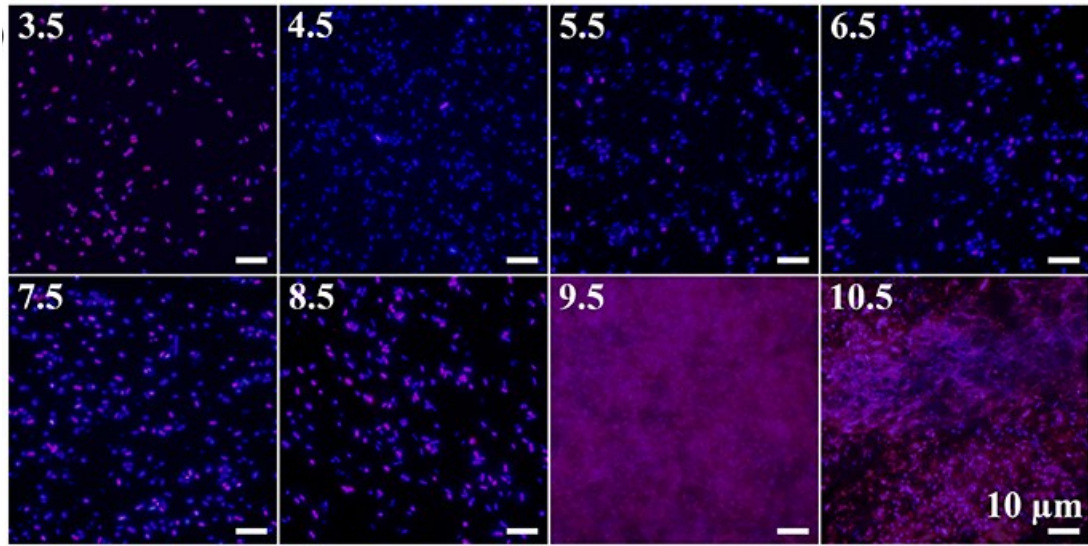

**Fig. S8.** Fluorescence images of cells after Se and Cd treatment for 3.5 h at different pHs. The blue signals represent the alive cells and the purple red signals represent the dead cells.

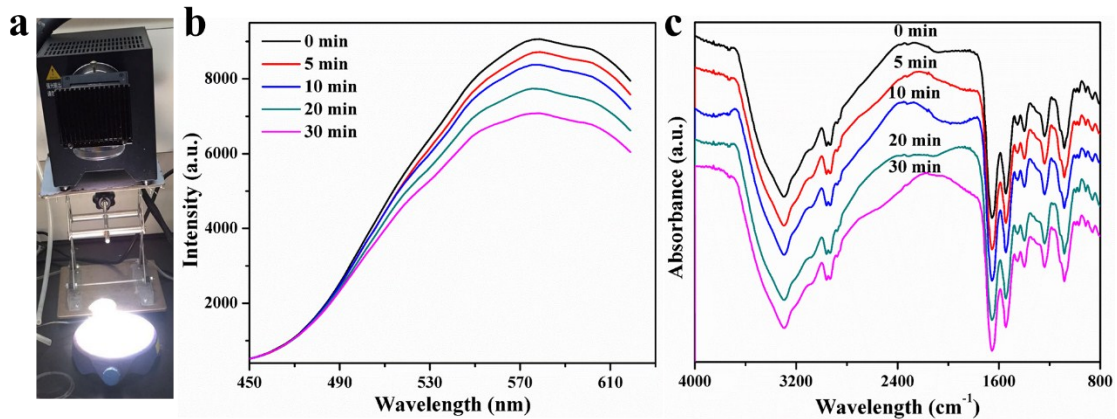

**Fig. S9.** (a) Photo of Bio-QDs under continuous illumination. Evolution in (b) fluorescence emission spectra and (c) FTIR spectra of the synthesized Bio-QDs with illumination time.

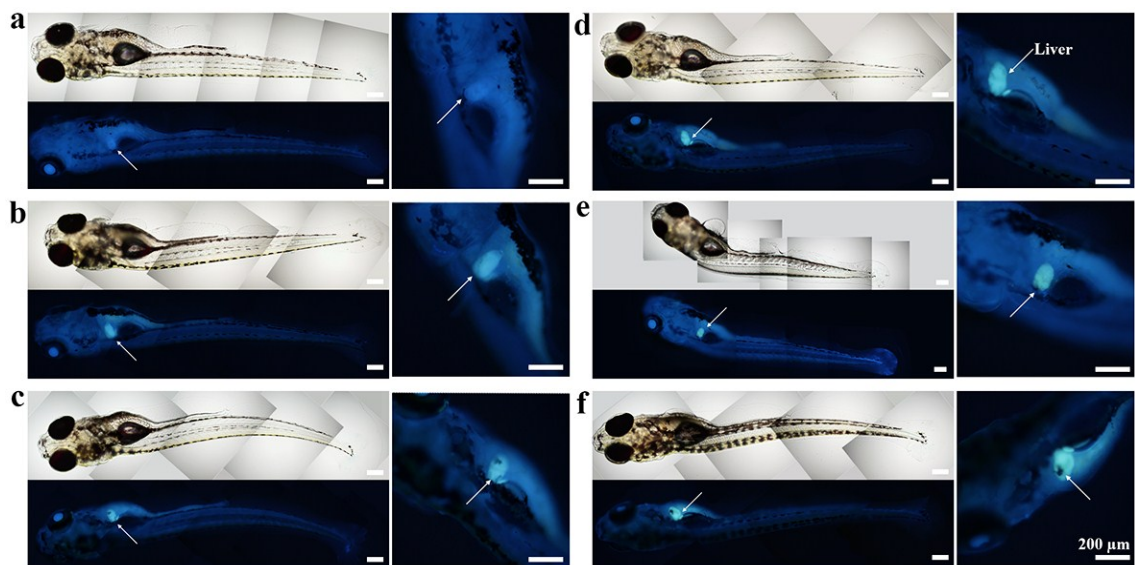

**Fig. S10.** Bright field and fluorescence images of the whole bodies (right) and the amplified parts (left) of larval zebrafish after 5-h soaking in Bio-QDs medium. The medium was spiked with different concentrations of Bio-QDs (a-f: 0, 2, 4, 6, 8, and 10  $\mu\text{g}/\text{mL}$ ).

## References

- 1 S. H. Kang, K. N. Bozhilov, N. V. Myung, A. Mulchandani and W. Chen, *Angew. Chem. Int. Edit.*, 2008, **47**, 5186-5189.
- 2 H. J. Bai, Z. M. Zhang, Y. Guo and G. E. Yang, *Colloid. Surface B*, 2009, **70**, 142-146.
- 3 Z. Yang, L. Lu, V. F. Berard, Q. He, C. J. Kiely, B. W. Berger and S. McIntosh, *Green Chem.*, 2015, **17**, 3775-3782.
- 4 T. J. Park, S. Y. Lee, N. S. Heo and T. S. Seo, *Angew. Chem. Int. Edit.*, 2010, **49**, 7019-7024.
- 5 J. P. Monras, V. Diaz, D. Bravo, R. A. Montes, T. G. Chasteen, I. O. Osorio-Roman, C. C. Vasquez and J. M. Perez-Donoso, *PLoS One*, 2012, **7**, e48657.
- 6 Z. Yan, J. Qian, Y. Gu, Y. Su, X. Ai and S. Wu, *Mater. Res. Express*, 2014, **1**, 015401.
- 7 R. Cui, H. H. Liu, H. Y. Xie, Z. L. Zhang, Y. R. Yang, D. W. Pang, Z. X. Xie, B. B. Chen, B. Hu and P. Shen, *Adv. Funct. Mater.*, 2009, **19**, 2359-2364.
- 8 Y. Li, R. Cui, P. Zhang, B. B. Chen, Z. Q. Tian, L. Li, B. Hu, D. W. Pang and Z. X. Xie, *ACS Nano*, 2013, **7**, 2240-2248.
- 9 A. K. Suresh, *Spectrochim. Acta. A*, 2014, **130**, 344-349.
- 10 S. R. Sturzenbaum, M. Hockner, A. Panneerselvam, J. Levitt, J. S. Bouillard, S. Taniguchi, L. A. Dailey, R. Ahmad Khanbeigi, E. V. Rosca, M. Thanou, K. Suhling, A. V. Zayats and M. Green, *Nat. Nanotechnol.*, 2013, **8**, 57-60.
- 11 R. Dunleavy, L. Lu, C. J. Kiely, S. McIntosh and B. W. Berger, *Proc. Natl. Acad. Sci. U. S. A.*, 2016, **113**, 5275-5280.
